# Supplementary material for: Ceramides and Cardiovascular Risk Factors, Inflammatory Parameters and Left Ventricular Function in AMI Patients
Source: Biomedicines. 2022 Feb 11;10(2):429. doi: 10.3390/biomedicines10020429 (PMC8962314; doi:10.3390/biomedicines10020429)
Supplement: Supplementary file 1 [file biomedicines-10-00429-s001.zip › biomedicines-1553762-supplementary/excel Supplemental Table S2.xlsx]

## Sheet: sheet1
TABLE S2. Ceramide concentrations (µM) in 123 plasma samples
Lipid species	01A	02A	03A	04A	05A	06A	07A	08A	09A	10A	11A	12A	13A	14A	15A	16A	17A	18A	19A	20A	21A	22A	23A	24A	25A	26A	27A	28A	29A	30A	31A	32A	33A	34A	35A	36A	37A	38A	39A	40A	41A	42A	43A	44A	45A	46A	47A	48A	49A
Cer(d18:1/16:0)	1.09692	1.37232	0.829694	0.988374	1.664	0.573091	1.16202	1.08395	1.01779	0.853631	0.673452	0.770505	0.633151	0.887404	0.895673	0.987764	1.29285	0.833263	1.34586	1.24367	0.882877	1.14836	0.686857	0.659525	1.35805	0.595374	0.796183	1.00378	1.26604	1.02963	1.56669	0.71532	0.464636	1.94576	0.628277	1.04678	1.00657	0.990288	1.16646	0.929794	0.792788	1.35482	1.09535	0.379421	0.798097	1.42394	0.839269	0.84719	0.814113
Cer(d18:1/18:0)	0.333288	0.707573	0.387777	0.252686	0.500584	0.220132	0.266961	0.408319	0.291159	0.25286	0.21195	0.248334	0.353395	0.357747	0.480042	0.591806	0.526697	0.287155	0.542104	0.445138	0.481783	0.532964	0.135091	0.144404	0.370629	0.0884879	0.197239	0.321276	0.265829	0.451927	0.914996	0.23049	0.289418	0.843447	0.19811	0.235016	0.302649	0.267048	0.467508	0.184096	0.307088	0.440264	0.258605	0.0851455	0.215431	0.904029	0.287764	0.414847	0.232318
Cer(d18:1/20:0)	0.288896	0.463765	0.31849	0.242328	0.447488	0.215257	0.233188	0.354526	0.284021	0.188187	0.155981	0.19663	0.227356	0.272619	0.371674	0.302039	0.442962	0.206553	0.401007	0.255994	0.247115	0.282629	0.0958344	0.12206	0.227008	0.0977928	0.21134	0.22135	0.252425	0.35705	0.513206	0.148234	0.130216	0.516513	0.101649	0.177655	0.218217	0.240413	0.29055	0.0941196	0.230142	0.285066	0.254427	0.0474297	0.166165	0.414151	0.121773	0.164511	0.212733
Cer(d18:1/22:0)	2.19731	2.79704	2.22865	1.89353	2.06501	1.34969	1.46119	1.96143	1.58375	1.16942	1.10127	1.18727	0.974969	1.75252	1.47747	1.50506	1.77864	1.31061	2.99811	1.46049	1.1494	1.02998	1.1185	1.0325	1.07811	1.0943	1.20694	1.04869	1.7144	1.58932	2.0859	0.996817	0.743609	1.6741	0.674932	1.17969	1.65286	1.29215	1.44639	0.994467	1.60986	1.40104	1.87438	0.478301	1.07298	1.72641	0.828998	0.820729	1.50193
Cer(d18:1/23:0)	1.8326	2.30264	1.28084	1.49113	1.38929	1.20206	0.782082	1.39939	1.2045	0.901853	0.966526	1.17682	0.502935	1.18152	1.28188	1.09726	1.62396	1.01971	2.47498	1.21538	0.907685	0.701741	0.94581	1.15802	0.896804	0.734991	1.05862	0.951206	1.32105	1.12564	1.76645	0.80419	0.537404	1.05009	0.580664	1.02415	1.08682	1.01788	0.913429	0.592241	1.12503	1.08334	1.23479	0.447053	0.790177	1.24472	0.455235	0.568565	0.632455
Cer(d18:1/24:0)	6.00284	6.84628	5.18376	5.25775	3.61437	2.61077	3.45944	4.32639	4.50657	2.71261	2.58988	2.89279	1.90659	3.72927	2.68824	3.22007	3.47511	3.76496	6.00458	3.37239	2.46976	2.14335	2.98418	2.87625	2.3949	3.40808	3.44116	2.60816	4.16275	3.01552	3.94253	2.67257	2.52024	2.72654	1.90659	3.06687	5.01316	3.19048	2.92673	3.39154	3.19744	2.80836	4.14621	1.68141	2.63166	3.1809	1.74991	1.79256	3.42375
Cer(d18:1/24:1)	1.48017	3.34802	1.51829	1.97622	3.24879	1.60856	1.5834	1.97361	1.42986	1.25542	1.02215	1.19684	1.32854	1.68594	1.43952	1.39156	2.3009	1.22095	2.10505	1.71092	1.20085	1.34351	0.729682	0.977754	1.76036	0.685377	1.24889	1.3651	1.57957	1.62579	2.56812	0.993161	0.612783	2.7335	0.756143	1.49166	1.74208	1.28371	1.13095	1.03912	1.36092	1.55755	1.5619	0.637677	1.24106	1.86916	0.747351	1.22931	1.14305
Cer(d18:1/25:0)	0.37089	0.473514	0.229532	0.354091	0.312136	0.119144	0.228575	0.244939	0.268441	0.139008	0.126021	0.254688	0.0616439	0.190537	0.136692	0.172519	0.343646	0.173999	0.216302	0.156852	0.10231	0.1666	0.119362	0.165469	0.147103	0.106454	0.178699	0.185315	0.192104	0.158679	0.444094	0.0862857	0.0618963	0.116577	0.0756839	0.212211	0.163989	0.187752	0.0906988	0.0562385	0.119057	0.112338	0.185576	0.0227705	0.0889754	0.0899938	0.000609301	0.0564735	0.0713231
Cer(d18:2/22:0)	0.403531	0.507635	0.254427	0.375068	0.389953	0.191321	0.226747	0.266091	0.323713	0.22283	0.247637	0.181572	0.100134	0.347563	0.333027	0.259475	0.356006	0.205509	0.848408	0.216389	0.167384	0.0791656	0.0910209	0.172171	0.175218	0.131035	0.229271	0.129424	0.392825	0.356006	0.294118	0.156764	0.0651865	0.281323	0.107646	0.152412	0.183487	0.184618	0.202114	0.0977145	0.239368	0.227792	0.314051	0.0673191	0.231447	0.265655	0.162161	0.0450883	0.233536
[truncated: 74 more columns]
